# Supplementary material for: Bile acid-dependent transcription factors and chromatin accessibility determine regional heterogeneity of intestinal antimicrobial peptides
Source: Springer Nature journal article supplement (doi:10.1038/s41467-023-40565-7), 2023-08-22
Supplement: MOESM1 [file 41467_2023_40565_MOESM1_ESM.pdf]

**a**

| Human epithelial cell cluster names | Representative genes                                                                                                            |                                    | Tissue enrichment (Postnatal) |     |     |     |     |     | Enrichment (Prenatal) |         |     |
|-------------------------------------|---------------------------------------------------------------------------------------------------------------------------------|------------------------------------|-------------------------------|-----|-----|-----|-----|-----|-----------------------|---------|-----|
|                                     | Functional genes                                                                                                                | Transcription factors (RSS top4)   | D                             | J   | I   | A   | C   | R   | Pro. SI               | Dis. SI | LI  |
| E01-Stem cells                      | <i>LGR5, RGMb, SMOc2, ASCL2</i>                                                                                                 | <i>BCL11A, ZNF121, NFIX, TAL1</i>  | +                             | +   | ++  | +   | +   | +   | ++                    | ++      | +   |
| E02-TA                              | <i>MCM5, TOP2A, CCNA2, PCNAF</i>                                                                                                | <i>HES6, HMGA2, E2F8, TP53</i>     | +                             | +   | +/- | ++  | +   | +   | ++                    | ++      | ++  |
| E03-Immature enterocytes            | High expression of: <i>OLFM4, DMBT1, CBR1, AKR7A3</i><br>Low expression of: functional genes in well differentiated enterocytes | <i>DBP, MAF, HNF1A, NR12</i>       | +++                           | +++ | ++  | +++ | +++ | +++ | +++                   | ++      | +++ |
| E04-APOA1+ Enterocytes              | <i>ALDOB, FABP2, ANPEP, ADIRF</i>                                                                                               | <i>MAF, NR13, DBP, PRDM16</i>      | +++                           | +++ | +++ | -   | -   | -   | ++                    | +++     | ++  |
| E05-CA1+Enterocytes                 | <i>CA1, AQP8, PEBP1, FABP5</i>                                                                                                  | <i>EPAS1, TFAP4, TFPC2L1, HES2</i> | -                             | -   | +/- | ++  | ++  | ++  | -                     | +/-     | ++  |
| E06-BEST4+ Enterocytes              | <i>CA7, BEST4, SPIB, CA4</i>                                                                                                    | <i>HES4, MEIS1, RBPJ, TFAP2E</i>   | +                             | +   | +   | +/- | +   | +   | +                     | +       | +   |
| E07-P13+ Enterocytes                | <i>LCN2, P13, S100A11, S100A6</i>                                                                                               | <i>PRRX2, HES2, ZNF257, RARG</i>   | -                             | -   | -   | +/- | +/- | +/- | -                     | -       | +/- |
| E08-IGKC+ Enterocytes               | <i>IGHA1, JCHAIN, IGKC, HSP90AA1</i>                                                                                            | <i>TCF21, PURA, IRX3, VAX2</i>     | -                             | -   | -   | +   | +   | +   | -                     | -       | +   |
| E09-Microfold cells                 | <i>CCL20, CCL23, MIA, PTMA</i>                                                                                                  | <i>ZXDA, ARNT2, NFE2L3, HOXD13</i> | -                             | -   | +/- | +   | +/- | +   | -                     | +/-     | +/- |
| E10-Enteroendocrine cells           | <i>CHGA, PCSK1N, SCGN, CHGB</i>                                                                                                 | <i>PAX6, ISL1, ASCL1, ARX</i>      | +/-                           | +   | +   | +   | +   | +   | +                     | +       | +   |
| E11-Tuft cells                      | <i>SH2D6, IRAG2, AZGP1, FYB1</i>                                                                                                | <i>ZFHX3, RUNX1, HOXA3, HOXA4</i>  | +/-                           | +   | +/- | +/- | +   | +/- | +/-                   | +/-     | +/- |
| E12-Goblet cells                    | <i>TFF3, MUC2, FCGBP, ITLN1</i>                                                                                                 | <i>ATOH1, TBX10, ARNT, FOXP4</i>   | +                             | +   | +   | +   | ++  | +   | +                     | +       | +   |
| E13-Paneth cells                    | <i>DEFA5, DEFA6, REG3A, REG1A</i>                                                                                               | <i>FOXL1, FOXF2, TCF21, NKX2-3</i> | +/-                           | +/- | +   | -   | +/- | +/- | +/-                   | +       | -   |
| E14-PGC+mucous cells                | <i>LYZ, ANXA10, TFF2, PGC</i>                                                                                                   | <i>GSC, FOXQ1, ZSCAN4, MECOM</i>   | +                             | +/- | +/- | -   | -   | -   | +/-                   | +/-     | -   |

**b**

| HIO epithelial cell cluster names | Representative genes                     |                                      |
|-----------------------------------|------------------------------------------|--------------------------------------|
|                                   | Functional genes                         | Transcription factors (RSS top4)     |
| HIO-01-Stem cells                 | <i>LGR5, RGMb, HMGC52, COL2A1</i>        | <i>HOXC8, HOXD9, HMGA2, NFYC</i>     |
| HIO-02-Immature enterocytes       | <i>OLFM4, DMBT1, CBR1, AKR7A3</i>        | <i>HNF1A, MAF, GATA5, DBP</i>        |
| HIO-03-Enterocytes                | <i>FABP1, APOB, SERPINA1, RBP2</i>       | <i>NR1D1, NR113, DBP, MAF</i>        |
| HIO-04-BEST4+ Enterocytes         | <i>FKBP1A, SPIB, BEST4, CA7</i>          | <i>TCF3, RBPJ, NFE2L3, HES4</i>      |
| HIO-05-Enteroendocrine cells      | <i>CADPS, CPE, CHGA, CHGB</i>            | <i>ASCL1, PAX3, PAX6, NHLH1</i>      |
| HIO-06-Goblet cells               | <i>SELENOM, ST6GALNAC1, TFF3, HPCAL1</i> | <i>BCL6B, FOXD4L5, ARNT, FOXD4L1</i> |
| HIO-07-PGC+mucous cells           | <i>LYZ, SPINK1, PGC, VSIG2</i>           | <i>FOXQ1, ZSCAN4, RBPJ, AHR</i>      |
| HIO-08-Basal like cells           | <i>ANXA1, S100A11, HSPB1, MDK</i>        | <i>RFX8, TP73, KLF14, LHX2</i>       |
| HIO-09-Ciliated like cells        | <i>ZMYND10, CFAP126, TPPP3, PIFO</i>     | <i>RFX8, TP73, KLF14, LHX2</i>       |

**c**

| Mouse epithelial cell cluster names | Representative genes                                                                |                                                                                   | Tissue enrichment |       |
|-------------------------------------|-------------------------------------------------------------------------------------|-----------------------------------------------------------------------------------|-------------------|-------|
|                                     | Functional genes                                                                    | Transcription factors (RSS top4)                                                  | Ileum             | Colon |
| E01-Stem cells                      | <i>Kcnaq1, Sema5a, Ctr, Camk1d</i>                                                  | <i>Hmga2, Mybl2, Esrg, Prdm5</i>                                                  | ++                | ++    |
| E02-TA                              | <i>Top2a, Cenpp, Casc5, Mki67</i>                                                   | <i>Pou2f1, Nup133, Mybl2, Mybl11</i>                                              | ++                | ++    |
| E03-Immature enterocytes            | Ileum: <i>St3gal4, Maird1, Sis, Pcsk5</i><br>Colon: <i>Mecom, Satb2, Car2, Htr4</i> | Ileum: <i>Maf, Mtf1, Barx2, Nr1h3</i><br>Colon: <i>Hoxa9, Hnf1b, Mecom, Grhl2</i> | ++                | ++    |
| E04-Apoa1+ Enterocytes              | <i>Apoa1, St3gal4, Slc5a1, Ace2</i>                                                 | <i>Maf, Barx2, Mtf1, Tbx3</i>                                                     | ++                | -     |
| E05-Aqp8+ Colonocytes               | <i>Cyp2c55, Lypd8, Slc26a3, Aqp8</i>                                                | <i>Hif1a, Foxd2, Hoxb13, Atf3</i>                                                 | -                 | ++    |
| E06-Fcgbp+ Colonocytes              | <i>Lypd8, S100a6, Krt8, Fth1</i>                                                    | <i>Hoxa13, Hoxb13, Cdx1, Hif1a</i>                                                | -                 | +     |
| E07-Microfold cells                 | <i>Esrrg, Dapk2, Pard3b, Akt3</i>                                                   | <i>Rarb, Sox8, Hoxd10, Onecut2</i>                                                | +/-               | +/-   |
| E08-Enteroendocrine cells           | <i>Kcna2, Rimb2, Cacna1a, Ptpn2</i>                                                 | <i>Isl1, Arx, Slc18a1, Creb12</i>                                                 | +                 | +     |
| E09-Tuft cells                      | <i>Dclk1, Sh2d6, Dgki, Neb1</i>                                                     | <i>Nfatc1, Runx1, Gm14434, Hsf2</i>                                               | +/-               | +     |
| E10-Immature goblet cells (Colon)   | <i>9030622O22Rik, Kcnma1, Slc12a8, Oit1</i>                                         | <i>Etv5, Nfatc2, Hoxd1, Mtf1</i>                                                  |                   | ++    |
| E11-Goblet cells                    | <i>Muc2, Fcgbp, Tff3, Bcas1</i>                                                     | <i>Tff3, Mxd4, Tbx3, Tead4</i>                                                    | +                 | +     |
| E12-Paneth cells                    | <i>Mmp7, Lyz1, Defa24, Defa3</i>                                                    | <i>Klf15, Bhlha15, Bcl6, Mef2c</i>                                                | ++                | -     |

## Supplemental Fig. 1 | Summary of epithelial cell subsets in human and mouse intestine.

**a** Overview of epithelial cell cluster characteristics from pre- and postnatal human intestine.

**b** Overview of epithelial cell cluster characteristics from human intestinal organoids.

**c** Overview of epithelial cell cluster characteristics from mouse intestine. The subset-specific TFs were obtained by regulon specificity score (RSS) and functional genes were obtained by differential expression analysis.

+++ indicates that the cell subset is detected and the proportion of it in the epithelial compartment of the respective region is more than 30%, ++ indicates that is more than 10% but less than 30%, + indicates that is more than 1% but less than 10%, +/- indicates that is less than 1%, and - indicates no detection of this cell subset.

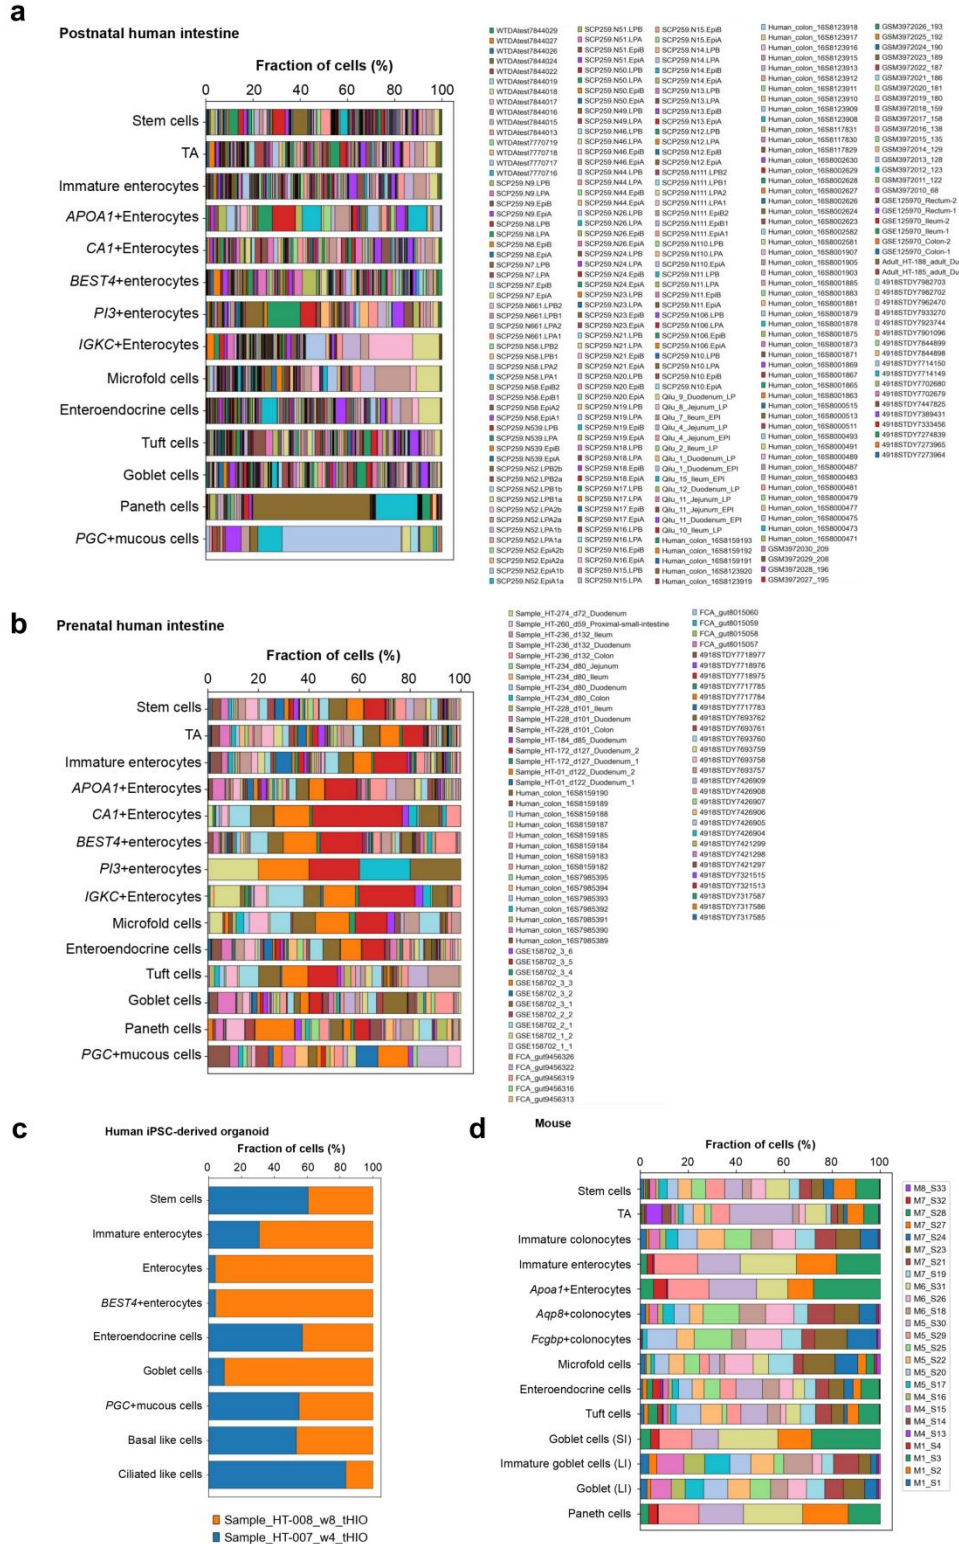

**Supplemental Fig. 2 | The distribution of samples in various cell clusters.**

**a-d** Bar plots showing the contributions of different samples in various cell clusters in postnatal human intestine(a), prenatal human intestine (b), human iPSC-derived organoid (c) and mouse (d).



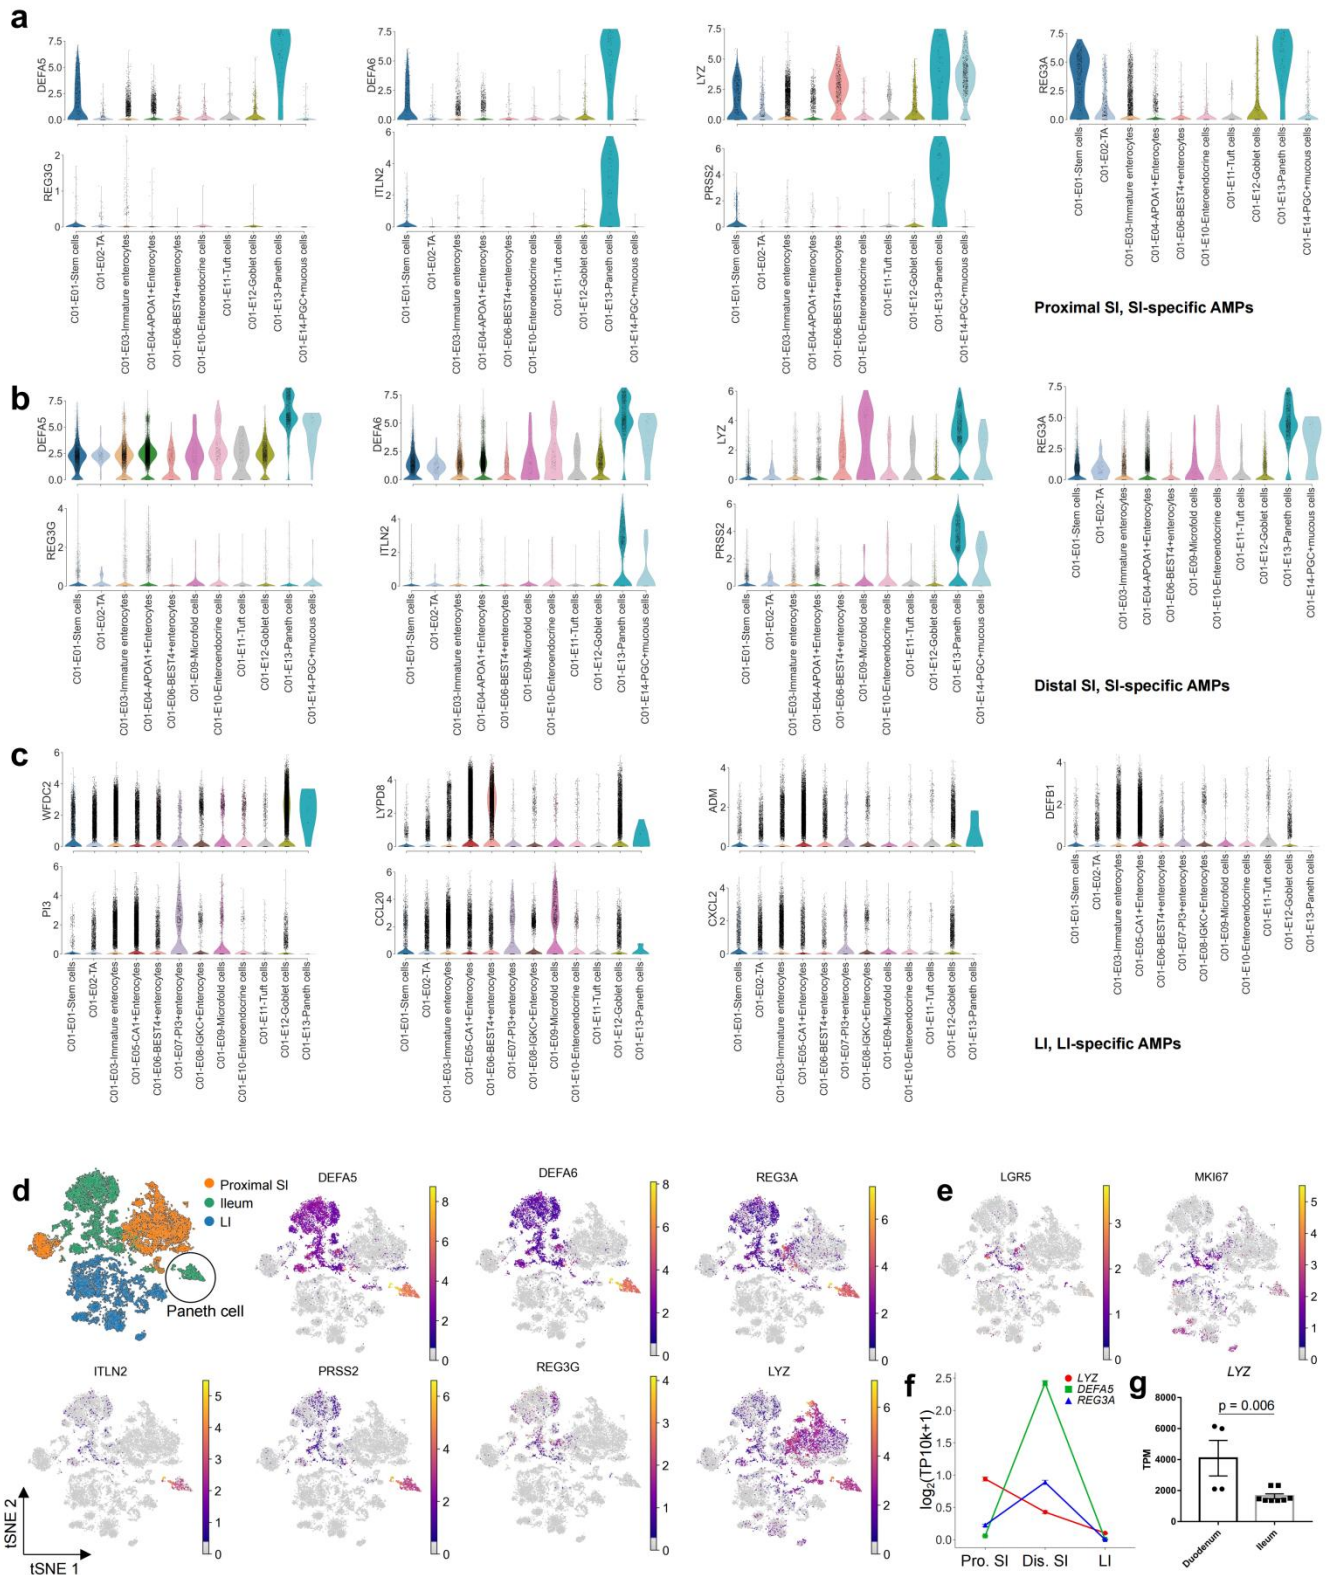

**Supplemental Fig. 3 | Regional heterogeneity and cell type specificity of AMPs in intestinal epithelial cells.**

**a-c** Violin plots showing the expression of SI-specific AMPs in the proximal (a) and distal SI (b), and LI-specific AMPs in the LI (c).

**d** t-SNE embedding showing the expression of SI-specific AMPs (*DEFA5*, *DEFA6*, *REG3A*, *REG3G*, *LYZ*, *ITLN2*, *PRSS2*, and *REG3G*) in epithelial cells. The same number of cells (10,000 cells) were randomly sampled from the proximal SI, ileum, and LI.

**e** t-SNE embedding showing the expression of stem cell (*LGR5*) and TA (*MKI67*) markers in epithelial cells. The same number of cells (10,000 cells) were randomly sampled from the proximal SI, ileum, and LI.

**f** Line chart showing the expression of three SI-specific AMPs (*LYZ*, *DEFA5*, *REG3A*) in proximal SI (Pro. SI), distal SI (Dis. SI) and LI in scRNA seq data. The length of the error bars is a 95% confidence interval for the mean.

**g** Bar plot of bulk RNA-seq data (E-MTAB-1733) showing that *LYZ* has a significantly higher expression level in the duodenum (n = 4 biologically independent samples) than in the ileum (n = 8 biologically independent samples). Data are presented as mean  $\pm$  SEM. All *p*-values were calculated and reported using two-tailed Student's *t*-test. Source data are provided as a Source Data file.



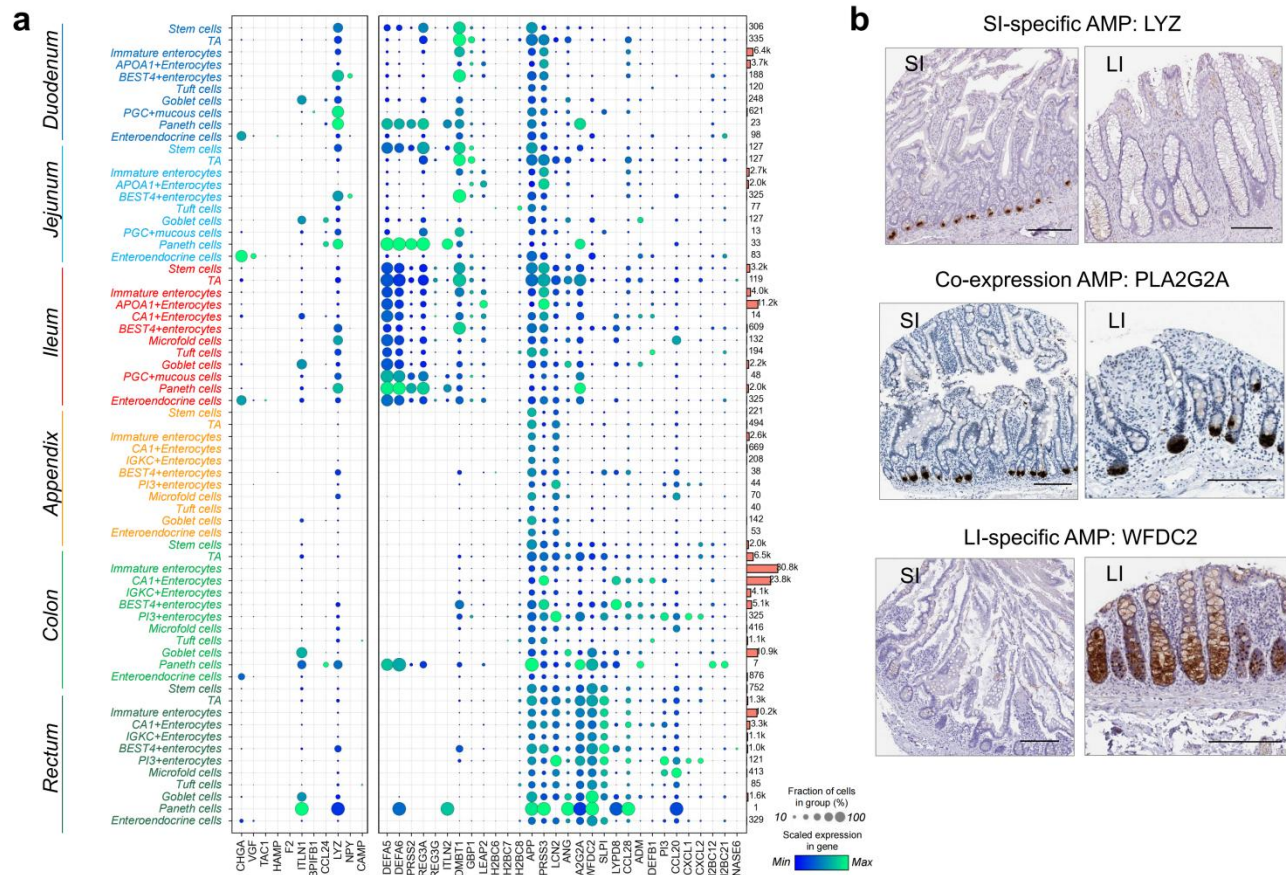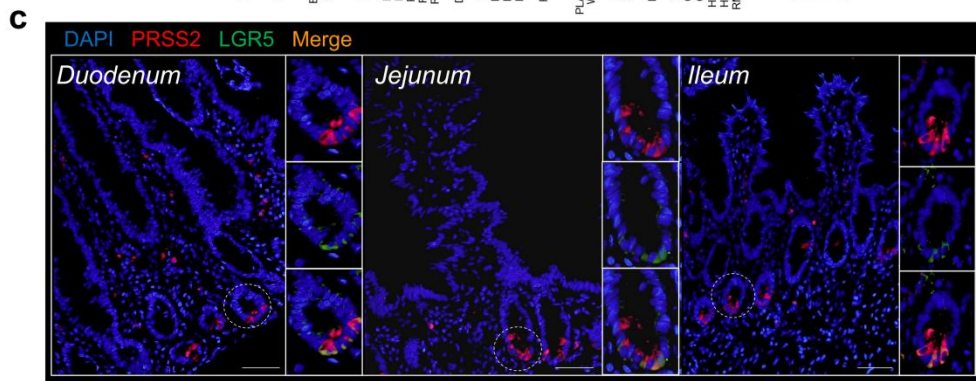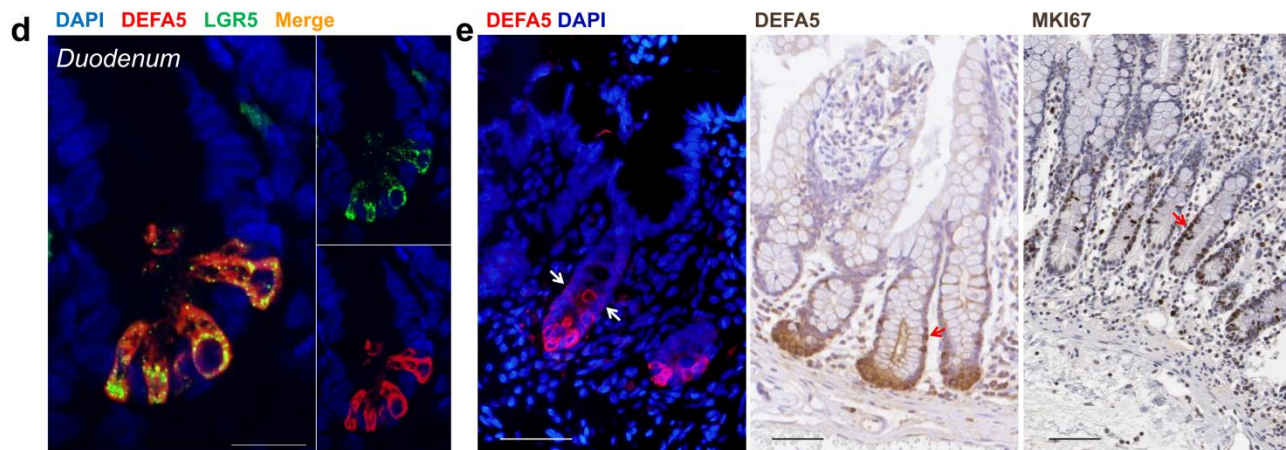

**Supplemental Fig. 4 | Multi-omics verification of the regional heterogeneity of antimicrobial peptides expressed on the crypt-villus axis and different intestinal regions.**

**a** Dot plot showing the diversity of AMPs expression pattern in different intestinal regions and cell specificity of AMPs.

**b** Bowel sections from human intestine are immunostained for LYZ, PLA2G2A and WFDC2, from <https://proteinatlas.org>. Scale bars, 200µm.

**c** Bowel sections from intestine are immunofluorescent stained for PRSS2 (red), LGR5 (green) and DAPI (blue). Scale bars, 50 µm. Staining repeated on two to three participants.

**d** RNAScope *in situ* hybridization of DEFA5 (red), LGR5 (green), and DAPI (blue) in bowel sections from the human duodenum. Scale bars, 10 µm. Staining repeated on two participants.

**e** Immunofluorescent (left) and immunohistochemical (middle) images showing the expression of DEFA5 in TA cells. Immunohistochemical (right, from <https://proteinatlas.org>) image showing the location of TA cells in the crypt by MKI67 staining. Scale bars, 50 µm in immunofluorescent image and 100µm in immunohistochemical images.

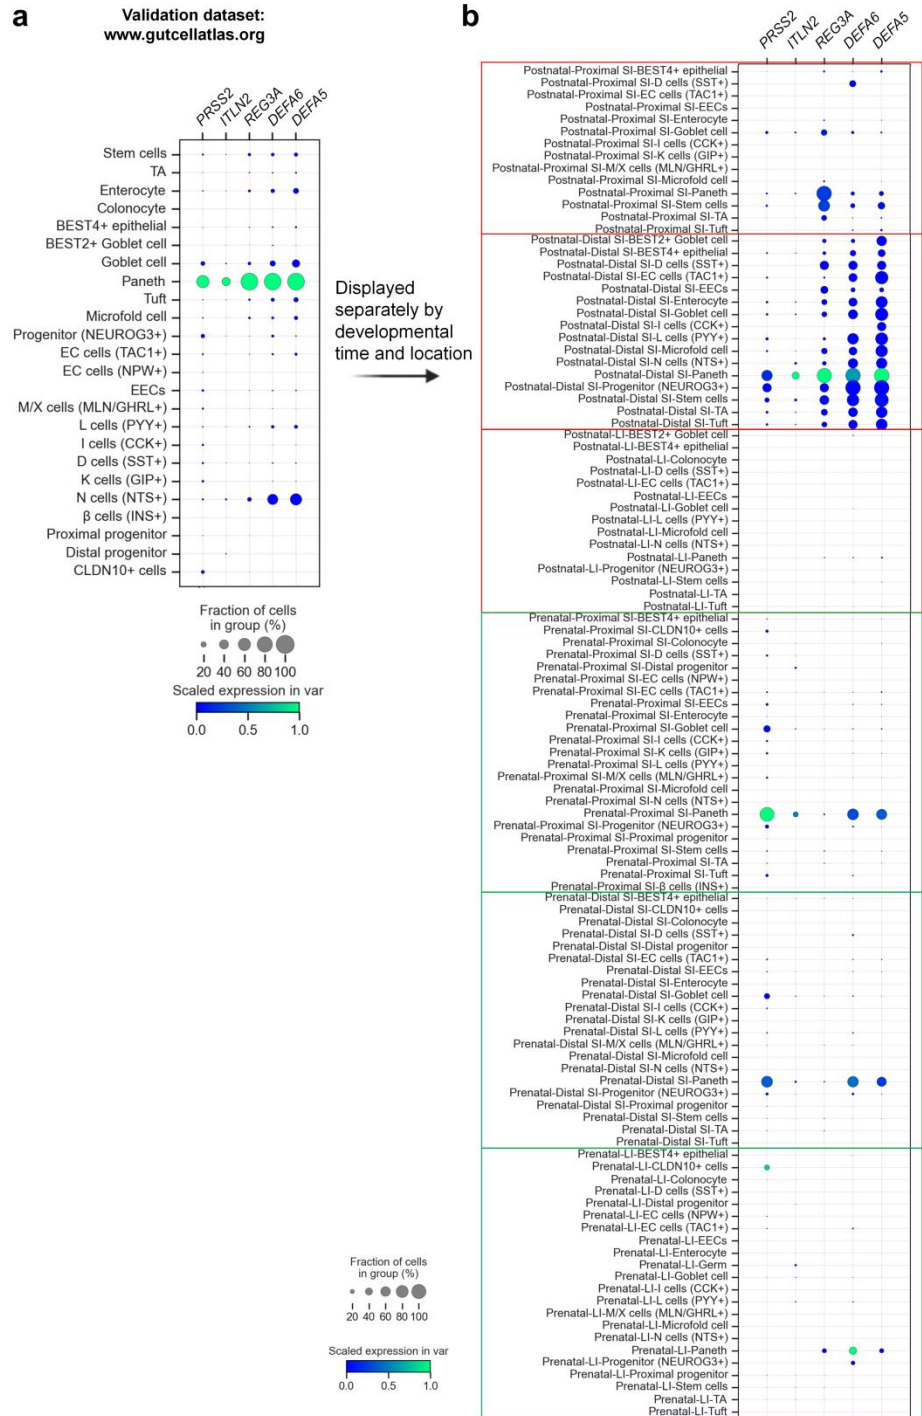

**Supplemental Fig. 5 | SI-specific AMPs are ubiquitously expressed in human postnatal ileal epithelium.**

**a** Dot plot showing the expression of SI-specific AMPs in epithelial cell lineages in the validation dataset (from [www.gutcellatlas.org](http://www.gutcellatlas.org)).

**b** Dot plot showing the expression of SI-specific AMPs in epithelial cell lineages grouped by developmental stage and anatomical location in the validation dataset (from [www.gutcellatlas.org](http://www.gutcellatlas.org)).



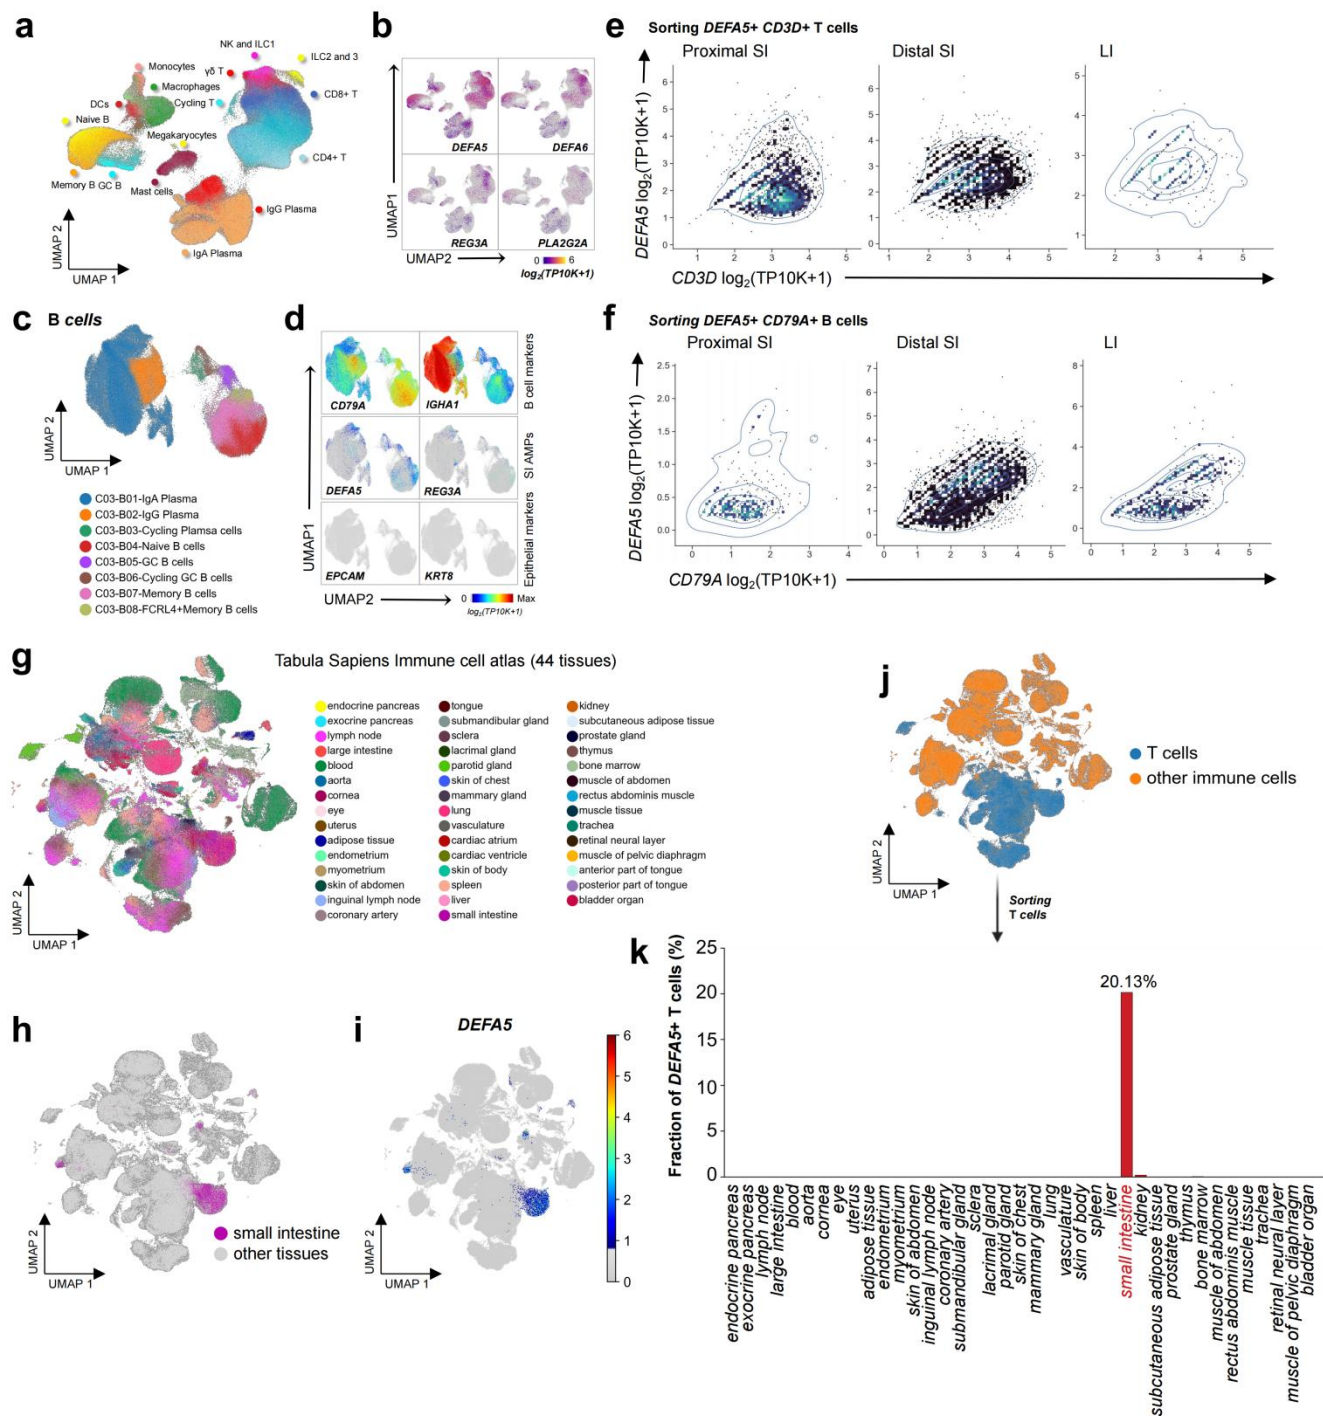

**Supplemental Fig. 6 | SI immune cells also highly express SI-specific AMPs.**

**a** UMAP embedding of human immune cells in scRNA-seq data.

**b** Feature plots showing the expression of SI-specific AMPs (*DEFA5*, *DEFA6*, *REG3A*, *REG3G*) in immune cell compartment.

**c** UMAP embedding of eight B/Plasma cell subsets.

**d** Feature plots showing the expression of B cell markers, SI-specific AMPs, and epithelial markers in B/Plasma compartment.



**e, f** Scatter plots showing the co-expression of representative SI-specific AMP (*DEFA5*) and the marker genes of T (e) and B cells (f).

**g** UMAP embedding of immune cells from 44 tissues (Tabula Sapiens cell atlas).

**h, i** UMAP embedding of immune cells coloured by anatomical location (small intestine, pink; other tissues, grey) (h), and representative SI-specific AMP (*DEFA5*) (i).

**j** UMAP embedding of immune cells coloured by cell types (T cells, blue; other immune cells, orange).

**k** Bar plot depicting the proportion of *DEFA5*<sup>+</sup> cells in T cell compartment of 44 human tissues.

**a**

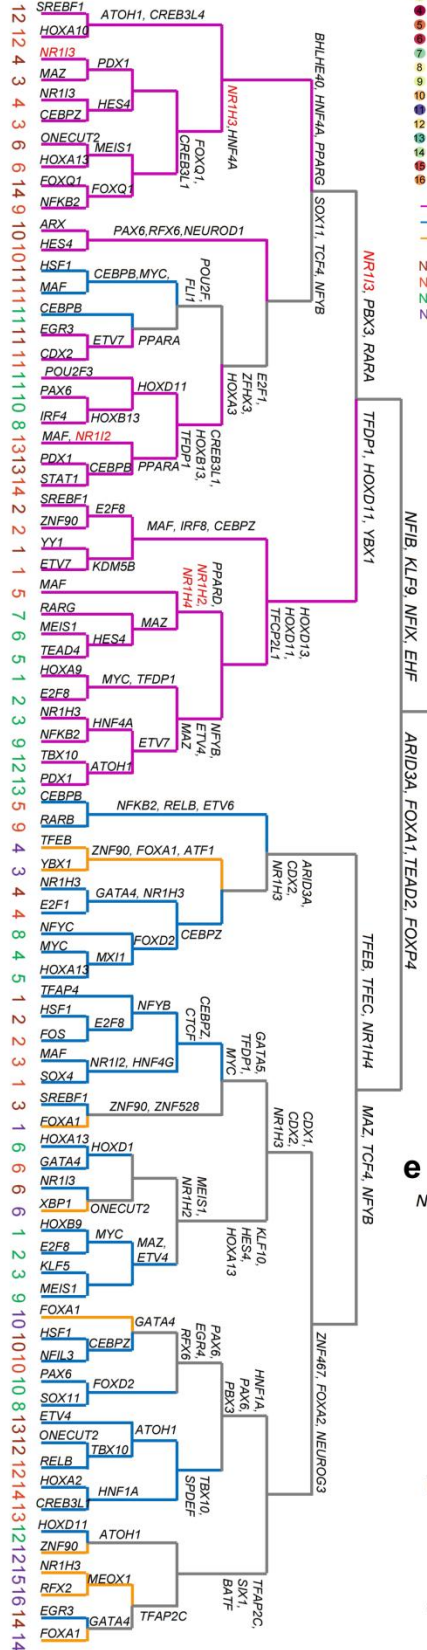

**b**

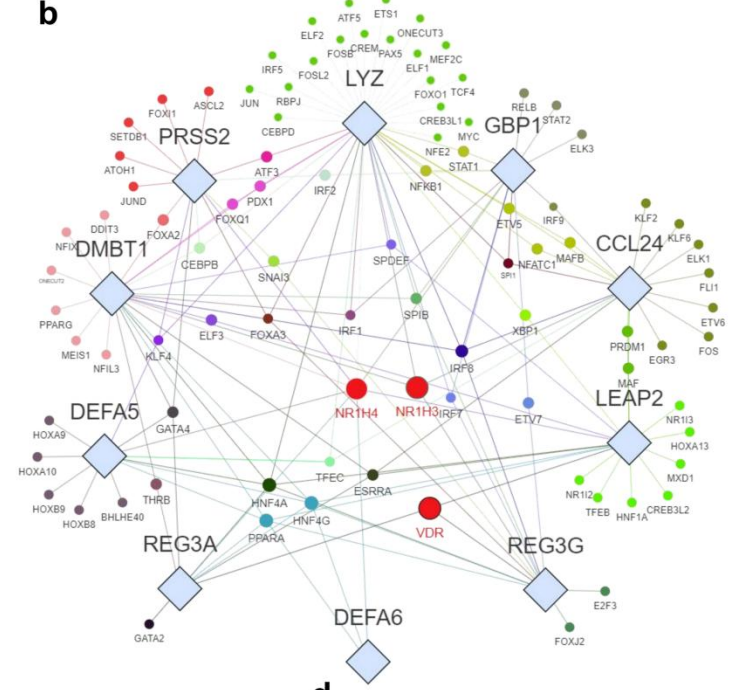

**c**

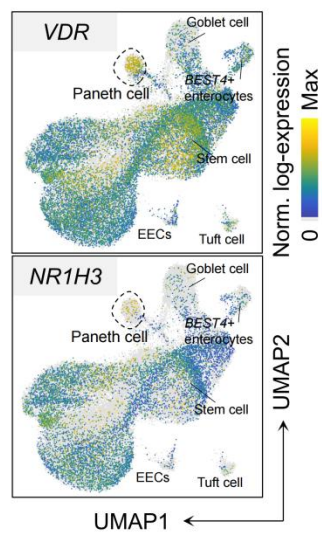

**d**

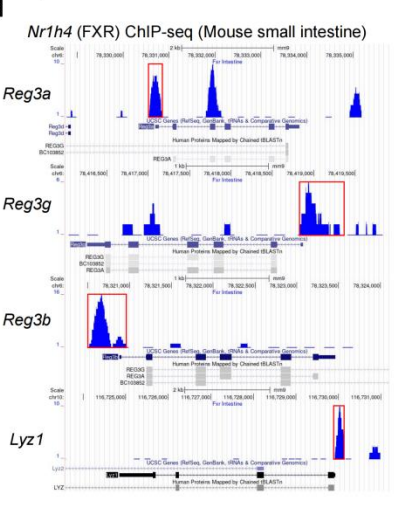

**e**

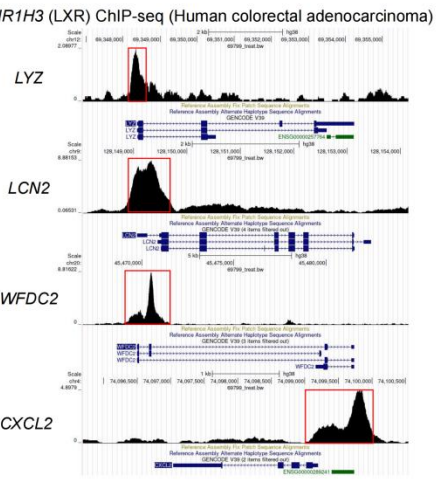

**f**

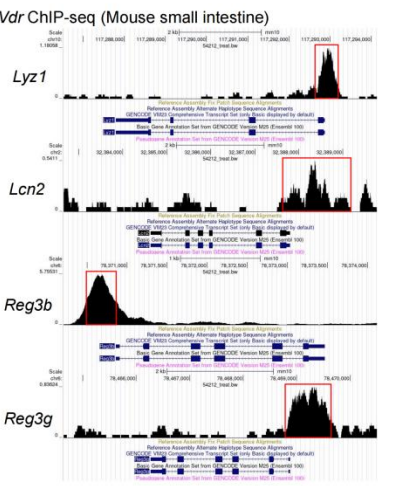

**Supplemental Fig. 7 | BATFs are the upstream regulators of intestinal AMPs.**

**a** A dendrogram of regulons for epithelial cell subsets in different developmental stage and anatomical location. TFs at each branching point are representative regulons of subjacent groups. BATFs in postnatal SI lineages are highlighted. Branches are colored by development stage. Numbers represent the cell types and are colored by intestinal region.

**b** Venn network plot of SI-specific AMPs and their TFs highlighting the common upstream elements such as *NR1H3*, *NR1H4* and *VDR*.

**c** Feature plots showing mRNA expression of *VDR* and *NR1H3* in small intestinal epithelial cells.

**d-f** Small or large intestinal ChIP-seq analysis of FXR (d), LXR (e), and VDR (f) binding sites in AMP genes.



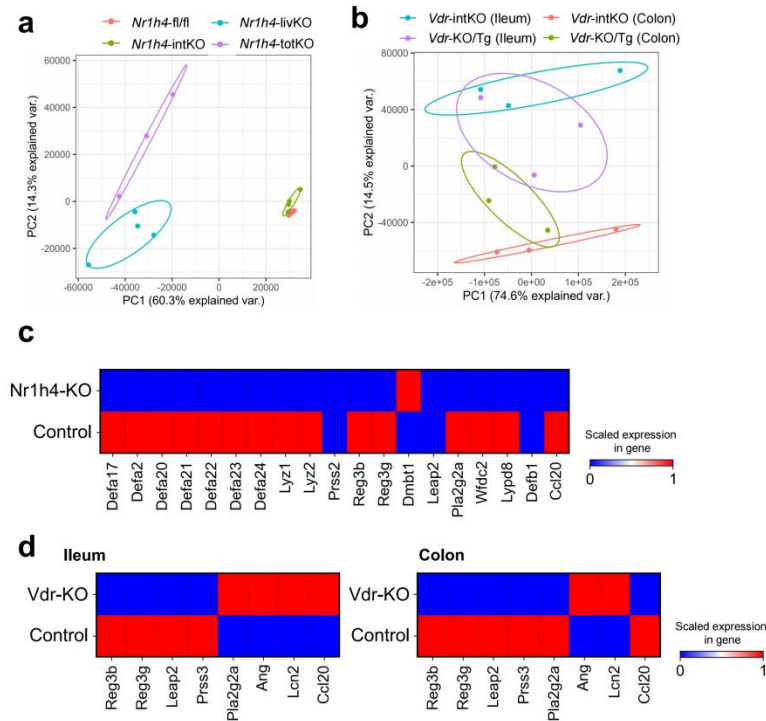

**Supplemental Fig. 8 | Effects of perturbing BATFs *in vivo* on predicted targeted AMPs.**

**a, b** PCA embedding demonstrating transcriptome of mice intestinal tissues with different genotypes (a, *Nr1h4* disturbance; b, *Vdr* disturbance).

**c** Heat map showing the expression of potential target genes of NR1H4 in *Nr1h4*-fl/fl (control) and *Nr1h4*-intKO mice.

**d** Heat map showing the expression of potential target genes of VDR in *Vdr*-intKO/TG (control) and *Vdr*-intKO mice.

Source data underlying **c** and **d** are provided as a Source Data file.

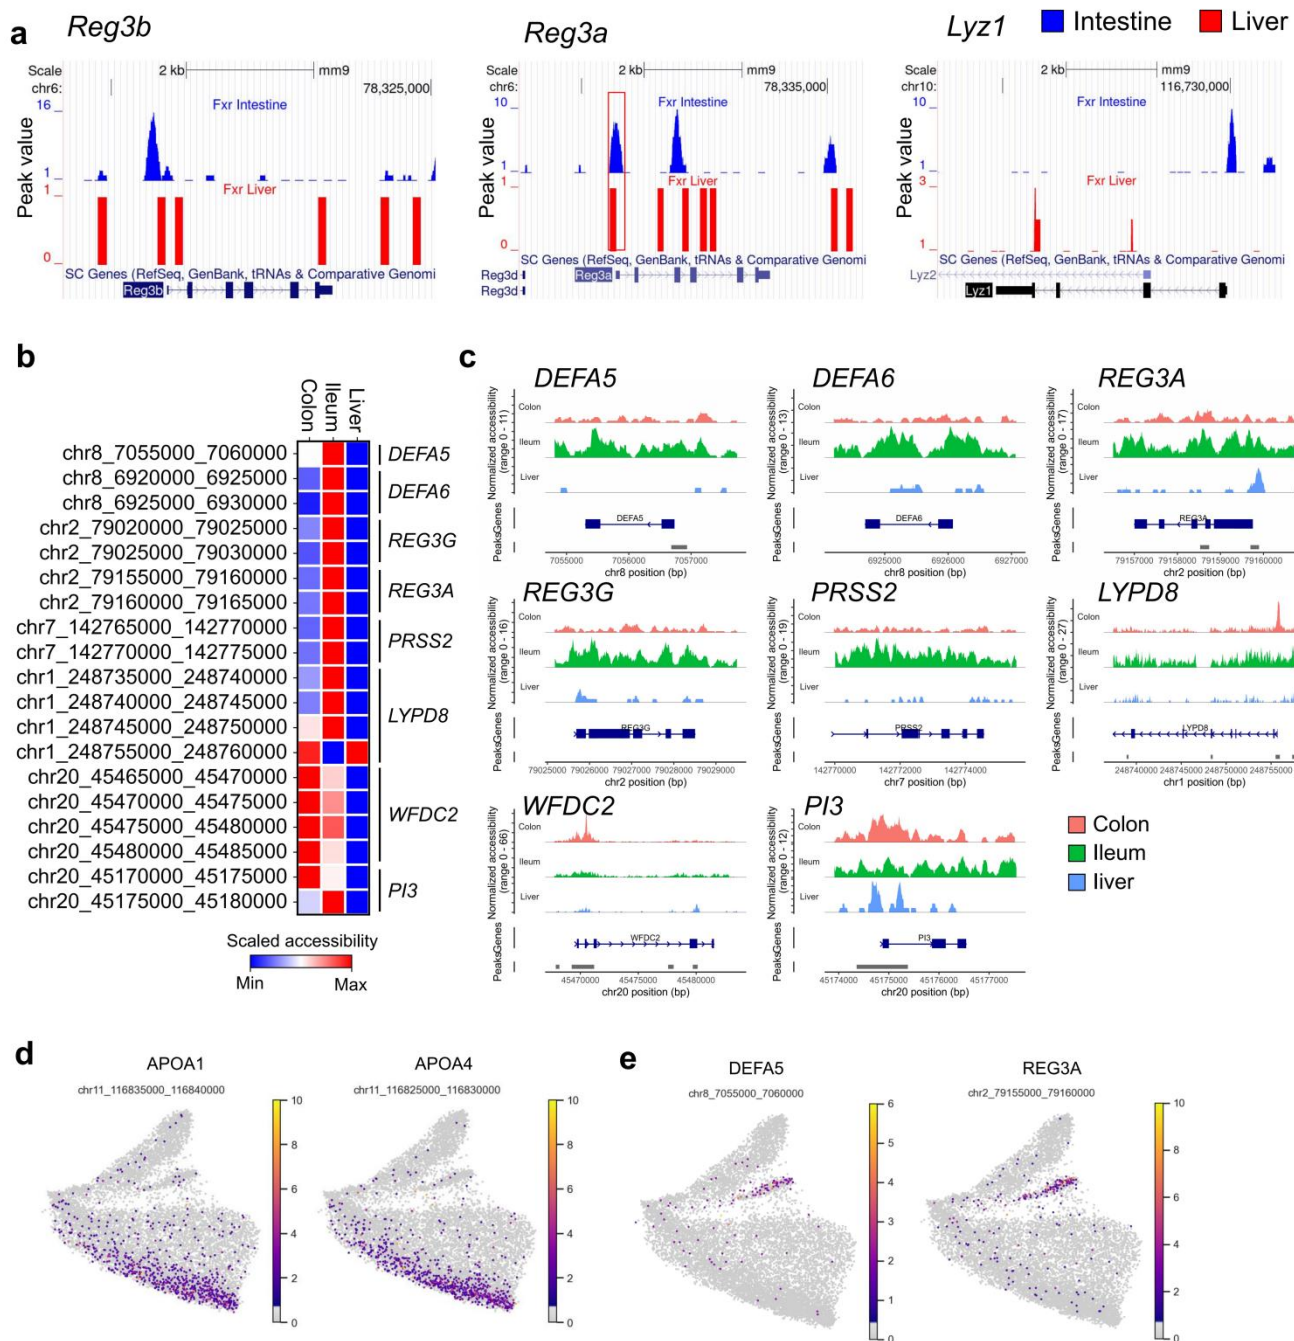

**Supplemental Fig. 9 | Chromatin accessibility is involved in shaping the regional heterogeneity of AMPs.**

**a** Intestinal (top) and hepatic (bottom) ChIP-seq analysis of FXR binding sites in *Reg3b*, *Reg3a*, and *Lyz1*.

**b** Chromatin accessibility of AMP-associated gene fragments in randomly sampled epithelial cells (n = 2500 cells, respectively) from three organs. The mean accessibility per organ is indicated with a colour scale from 0 (closed) to 1 (open).

**c** Aggregated single-cell profiles showed significant differences in chromatin accessibility of SI- (i.e. *DEFA5*, *DEFA6*, *REG3A*, *REG3G*, *PRSS2*), co-expression, and LI- (i.e. *LYPD8*, *WFDC2*, *PI3*) specific AMPs in human liver, ileum, and colon tissue. Cells included in the analysis were randomly selected from the three organs (n = 2500 cells, respectively) to avoid the bias of differences in cell numbers.

**d, e** UMAP embedding showing the chromatin accessibility of enterocyte markers (d, *APOA1* and *APOA4*) and Paneth cell markers (e, *DEFA5* and *REG3A*) in the human ileum.



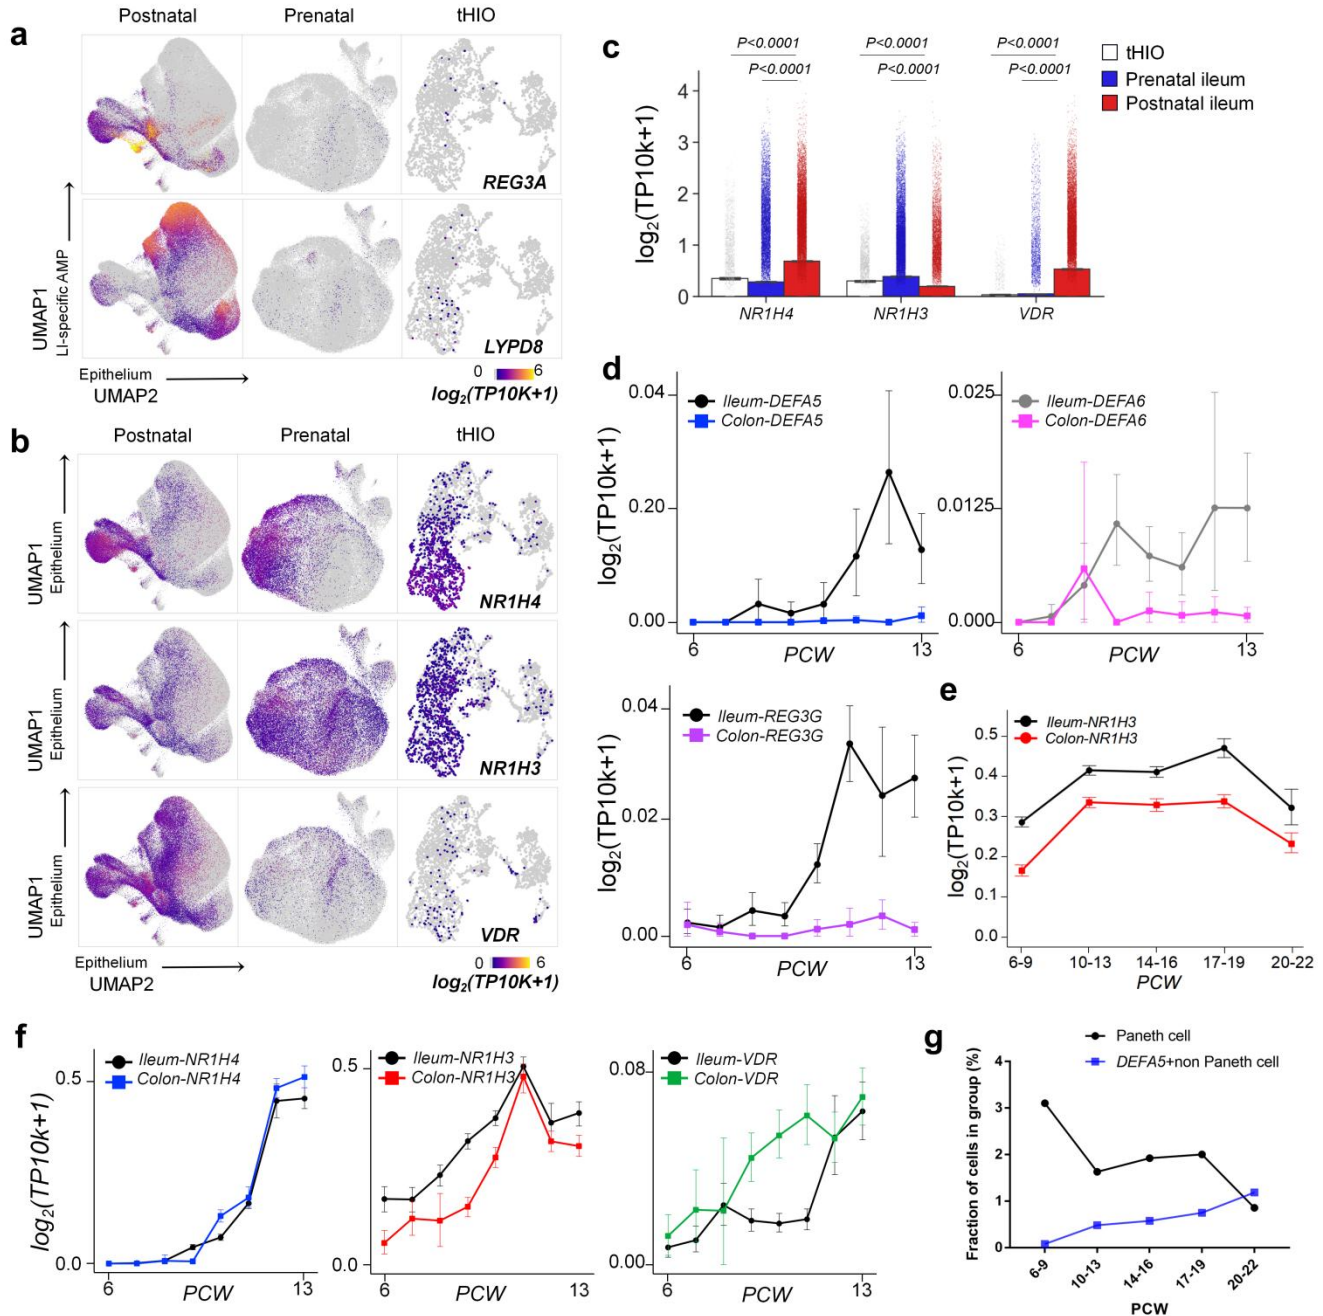

**Supplemental Fig. 10 | BATFs-AMPs axis establishes intestinal AMPs immune surveillance before birth.**

**a** Feature plots showing expression of selected AMP genes that varies in postnatal, prenatal and tHIO.  
**b, c** Feature plots (b) and bar plots (c) showing expression of BATFs (*NR1H4*, *NR1H3*, and *VDR*) that varies in postnatal (n = 24094 cells), prenatal (n = 31916 cells) and tHIO (n = 3164 cells).  
**d** Shown are changes in expression of SI-specific AMPs (*DEFA5*, *DEFA6* and *REG3G*) during 6-13 PCW of fetal development (n = 1055 and 715 cells for ileum and colon in 6 PCW respectively, n = 938 and 505 cells for ileum and colon in 7 PCW respectively, n = 1800 and 188 cells for ileum and colon in 8 PCW respectively, n = 4204 and 1978 cells for ileum and colon in 9 PCW respectively, n = 4991 and

2214 cells for ileum and colon in 10 PCW respectively, n = 2677 and 802 cells for ileum and colon in 11 PCW respectively, n = 1168 and 3148 cells for ileum and colon in 12 PCW respectively, n = 3020 and 2983 cells for ileum and colon in 13 PCW respectively).

**e** Regional heterogeneity of bile acid nuclear receptor (i.e. *NR1H3*) gradually established with fetal development (n = 7997 and 3386 cells for ileum and colon in 6-9 PCW respectively, n = 11856 and 9147 cells for ileum and colon in 10-13 PCW respectively, n = 8382 and 5510 cells for ileum and colon in 14-16 PCW respectively, n = 2746 and 4856 cells for ileum and colon in 17-19 PCW respectively, n = 935 and 1835 cells for ileum and colon in 20-22 PCW respectively).

**f** Shown are changes in expression of BATFs during 6-13 PCW of fetal development (n = 1055 and 715 cells for ileum and colon in 6 PCW respectively, n = 938 and 505 cells for ileum and colon in 7 PCW respectively, n = 1800 and 188 cells for ileum and colon in 8 PCW respectively, n = 4204 and 1978 cells for ileum and colon in 9 PCW respectively, n = 4991 and 2214 cells for ileum and colon in 10 PCW respectively, n = 2677 and 802 cells for ileum and colon in 11 PCW respectively, n = 1168 and 3148 cells for ileum and colon in 12 PCW respectively, n = 3020 and 2983 cells for ileum and colon in 13 PCW respectively).

**g** Shown are changes in the fraction of *DEFA5* positive non-Paneth cells and Paneth cells during 6-22 PCW of fetal development.

The length of the error bars is a 95% confidence interval for the mean in Supplemental Fig. 10. NS, not significant. All *p*-values were calculated and reported using two-tailed Student's *t*-test.

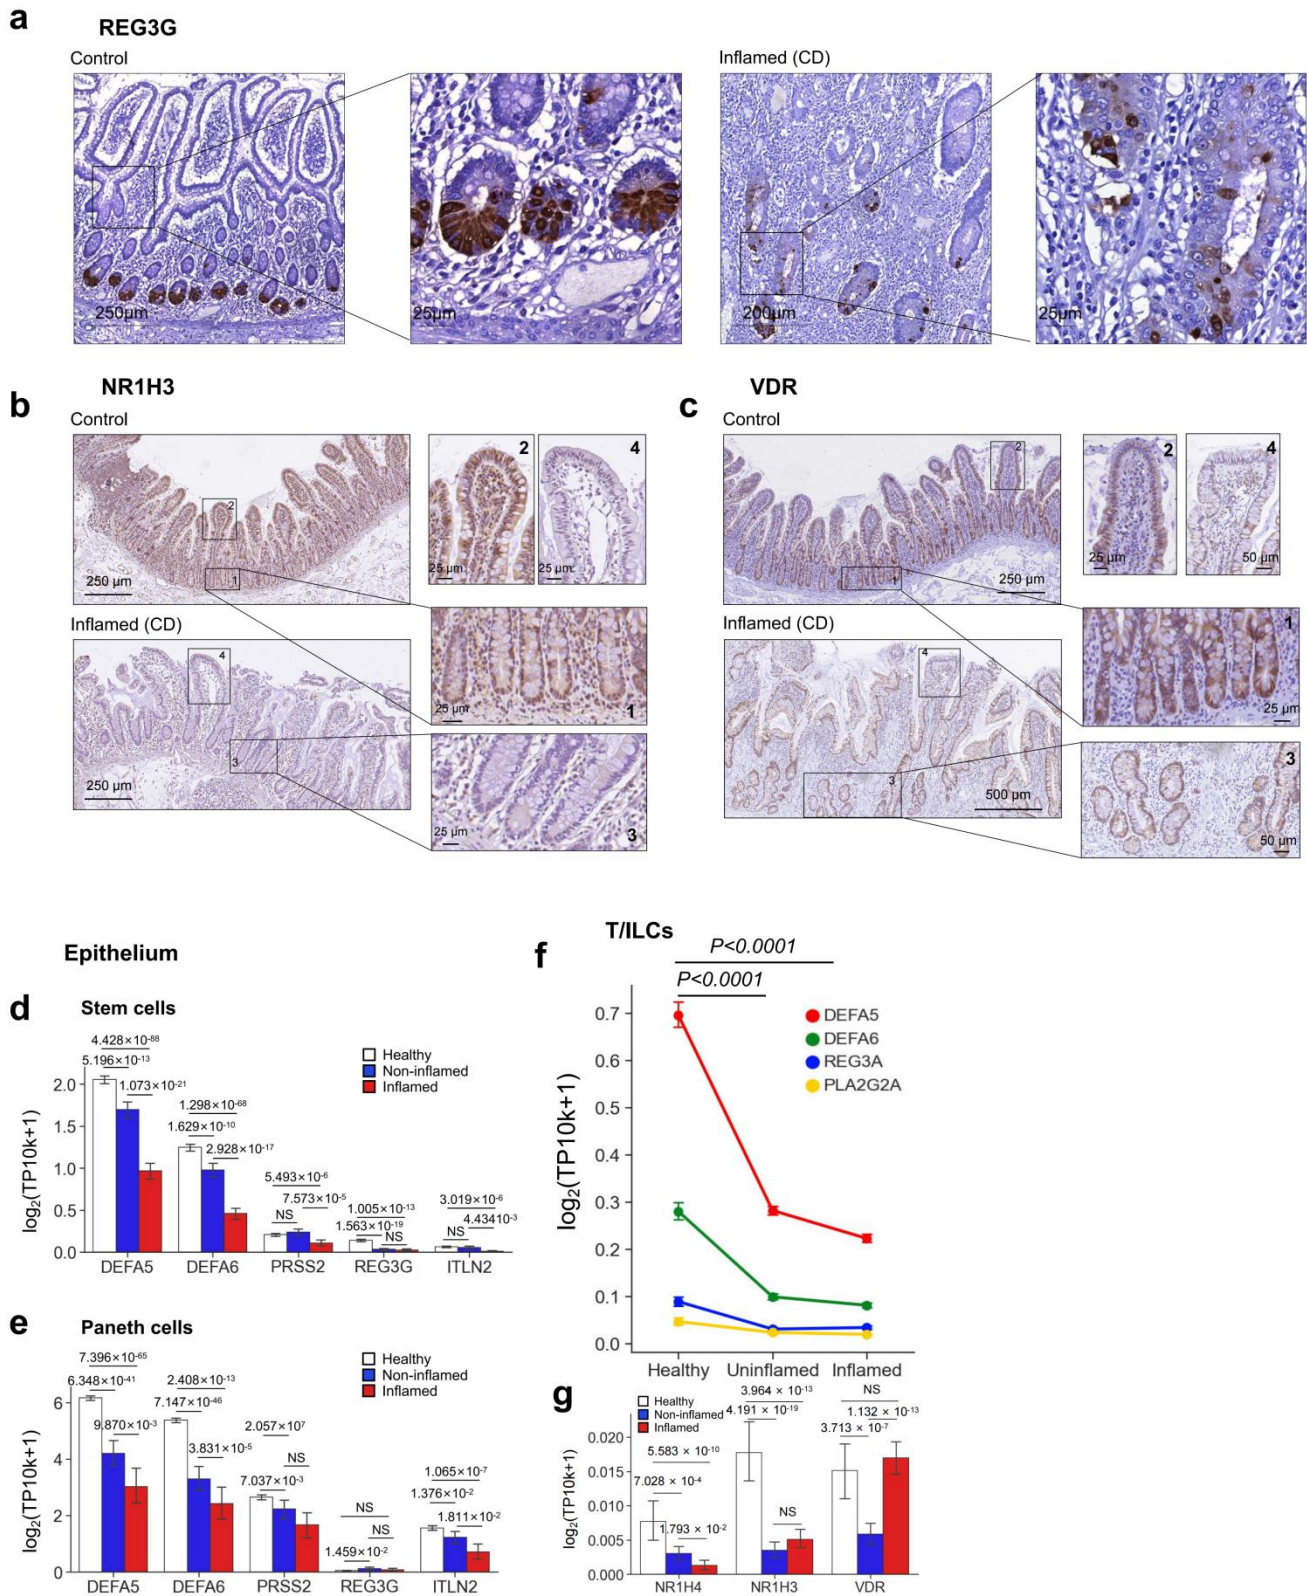

**Supplemental Fig. 11 | Abnormal BATFs-AMPs axis mediates disruption of AMPs in Crohn's disease.**



**a** Expression of REG3G in histological sections (n = 3 for each phenotype). Scale bars, 250 or 25  $\mu$ m.

**b, c** Expression of NR1H3 (a) and VDR (b) in histological sections (n = 9 for each phenotype). Scale bars, 250, 50 or 25  $\mu$ m.

**d, e** Shown are changes in expression of Paneth cell-AMPs (*DEFA5*, *DEFA6*, *PRSS2*, *REG3G*, *ITLN2*) in ileal stem cells (d) and Paneth cells (e) during CD progression (n = 3244, 1435, and 817 cells for stem cells in healthy, non-inflamed, and inflamed states respectively; n = 1958, 222, and 122 cells for Paneth cells in healthy, non-inflamed, and inflamed states respectively).

**f, g** Shown are changes in expression of AMPs (*DEFA5*, *DEFA6*, *REG3A*, *PLA2G2A*) (f) and BATFs (*NR1H4*, *NR1H3*, *VDR*) (g) in ileal T/ILCs during the progression of CD (n = 7786, 27107, and 27479 cells for T/ILCs in healthy, non-inflamed, and inflamed states respectively).

The length of the error bars is a 95% confidence interval for the mean in Supplementary Fig. 11. NS, not significant. All *p*-values were calculated and reported using two-tailed Student's *t*-test.
